# Supplementary material for: Measuring P2X1 receptor activity in washed platelets in the absence of exogenous apyrase
Source: Royal Society of Chemistry journal article supplement (doi:10.1039/c1ay05530e), 2011-11-07
Supplement: c1ay05530e.pdf [file c1ay05530e.pdf]

## **Measuring P2X1 Receptor Activity in Washed Platelets in the Absence of Exogenous Apyrase**

Kari B. Anderson, Welivitiya Karunaratne and Dana M. Spence  
Michigan State University  
Department of Chemistry  
East Lansing, MI 48824

[dspence@chemistry.msu.edu](mailto:dspence@chemistry.msu.edu)  
517.355.9715 x174

**Figure S1.**

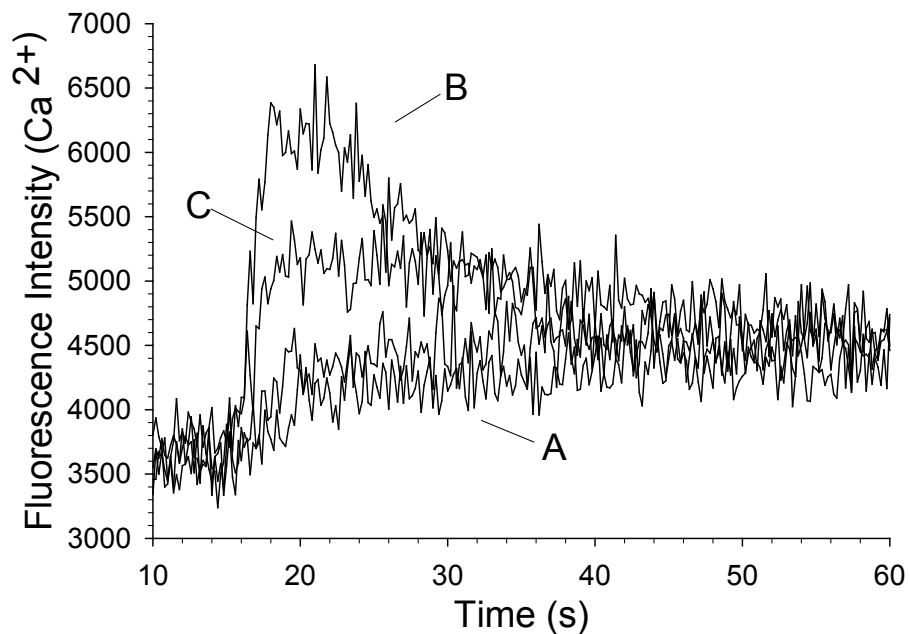

**Fig. S1** Overcoming NF449 inhibition using 10  $\mu\text{M}$  ATP. As the concentration of NF449 exceeds 0.5  $\mu\text{M}$ , inhibition of  $\text{Ca}^{2+}$  influx occurs when 2.5  $\mu\text{M}$  ATP is added to 20 and 40  $\mu\text{M}$  NF449 platelet samples (traces A). When 10  $\mu\text{M}$  ATP is added, the NF449 inhibition is overcome and  $\text{Ca}^{2+}$  influx occurs in 20 and 40  $\mu\text{M}$  NF449 platelet samples, traces B and C, respectively.

**Figure S2.**

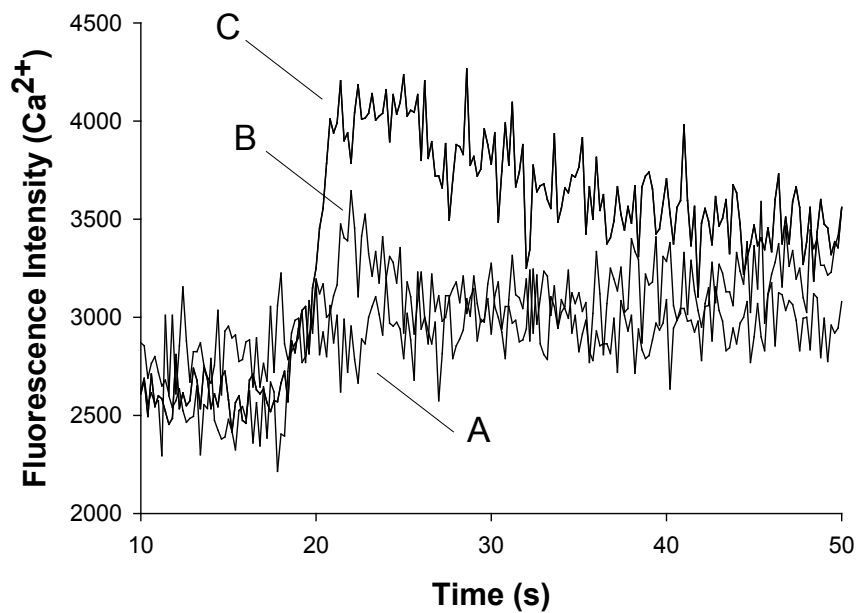

**Fig S2.** NF449 a more effective P2X sensitizer than apyrase. When CaMTB is added to platelets that were resuspended with 0.5 U/mL apyrase no Ca<sup>2+</sup> influx is observed (trace A). However, when 2.5 μM ATP is added to the platelets containing apyrase (trace B) a Ca<sup>2+</sup> influx does occur, though the Ca<sup>2+</sup> increase from 2.5 μM ATP in the presence of 2.5 NF449 μM is more prominent (trace C).
